# Supplementary material for: Two-dimensional transition metal diborides: promising Dirac electrocatalysts with large reaction regions toward efficient N2 fixation
Source: Royal Society of Chemistry journal article supplement (doi:10.1039/c9ta08820b), 2019-01-01
Supplement: c9ta08820b1.pdf [file c9ta08820b1.pdf]

## Supplementary information

### **Two-dimensional transition metal diborides: promising Dirac electrocatalysts with large reaction regions toward efficient N<sub>2</sub> fixation**

Xuemin Hu,<sup>a</sup> Shiyong Guo,<sup>b</sup> Shengli Zhang,<sup>\*b</sup> Xiangyu Guo,<sup>c</sup> Yafei Li<sup>d</sup>, Shiping Huang,<sup>c</sup> Kan Zhang<sup>b</sup> and Junwu Zhu<sup>\*a</sup>

<sup>a</sup>Key Laboratory for Soft Chemistry and Functional Materials, Ministry of Education, Nanjing University of Science and Technology, Nanjing 210094, China

<sup>b</sup>MIIT Key Laboratory of Advanced Display Materials and Devices, School of Materials Science and Engineering, Nanjing University of Science and Technology, Nanjing 210094, China

<sup>c</sup>State Key Laboratory of Organic-Inorganic Composites, Beijing University of Chemical Technology, Beijing 100029, China

<sup>d</sup>Jiangsu Key Laboratory of New Power Batteries, Jiangsu Collaborative Innovation Centre of Biomedical Functional Materials, School of Chemistry and Materials Science, Nanjing Normal University, Nanjing 210023, China

\*Corresponding author E-mail: [zhangslvip@njust.edu.cn](mailto:zhangslvip@njust.edu.cn), [zhujw@njust.edu.cn](mailto:zhujw@njust.edu.cn)

**Table S1.** The optimized lattice constants ( $a$ ,  $b$ ), buckling height, B-B and M-B bond lengths, Bader charge of transition metals, cohesive energies of TiB<sub>2</sub> and NbB<sub>2</sub> monolayers.

**Table S2.** Effective independent elastic constants ( $C_{ij}$ , N/m), Young's modulus ( $E$ , N/m), and Poisson's ratio ( $\nu$ ) of TiB<sub>2</sub> and NbB<sub>2</sub> monolayers.

**Table S3.** Computed adsorption energies ( $E_{ad}$ , eV) of N<sub>2</sub> on boron and transition metal surfaces of TiB<sub>2</sub> and NbB<sub>2</sub> monolayers by end-on and side-on way.

**Table S4.** Computed zero-point energies ( $E_{ZPE}$ , eV) and entropy at  $T=298.15$  K ( $TS$ , eV) of different adsorption species for each adsorption species for TiB<sub>2</sub> and NbB<sub>2</sub> monolayers, which are obtained from the vibrational frequency calculations.

**Table S5.** Computed electronic energies ( $\Delta E$ , eV) and Gibbs free energies ( $\Delta G$ , eV) for each reaction steps

**Table S6.** Optimized N-N bond lengths (Å) during the NRR on TiB<sub>2</sub> and NbB<sub>2</sub> monolayers.

**Fig. S1.** Phonon spectra of (a) TiB<sub>2</sub> and (b) NbB<sub>2</sub> monolayers.

**Fig. S2.** Schematic diagrams of density of states around Fermi level for (a) TiB<sub>2</sub> and (b) NbB<sub>2</sub> monolayers.

**Fig. S3.** The band structures based on HSE06 functional of (a) TiB<sub>2</sub> and (b) NbB<sub>2</sub> monolayers.

**Fig. S4.** Variations of the DFT energy of (a) TiB<sub>2</sub> and (b) NbB<sub>2</sub> monolayer from 0 to 5 ps during ab initio molecular dynamics (AIMD) simulations at the temperature of 300 K under H<sub>2</sub>O and N<sub>2</sub> atmosphere. (c-d) Snapshot of atomic configuration of AIMD simulations for NbB<sub>2</sub> monolayer. (c) is the initial structure, and (d) is the final structure after 5 ps. The model we use here includes a  $4 \times 4 \times 1$  TiB<sub>2</sub>/NbB<sub>2</sub> supercell, 4 N<sub>2</sub> molecules, and 9 H<sub>2</sub>O molecules. Green, blue, orange atoms are N, O, H, respectively. Gray and pink atoms represent Nb and B.

**Fig. S5.** (a) The adsorption energies between TMs and O/H atoms of H<sub>2</sub>O/N<sub>2</sub> on the TM side of 2D TiB<sub>2</sub> and NbB<sub>2</sub> monolayers. (b-d) The atomic structures of H<sub>2</sub>O and N<sub>2</sub> adsorbed on the TM side of 2D TiB<sub>2</sub> and NbB<sub>2</sub> monolayers.

**Fig. S6.** The charge variations of the \*N<sub>x</sub>H<sub>y</sub> during the NRR steps for (a) TiB<sub>2</sub> and (b)

NbB<sub>2</sub> monolayers.

**Fig. S7.** Charge density difference of (a-c) N<sub>2</sub>-TiB<sub>2</sub> and (d-f) N<sub>2</sub>-NbB<sub>2</sub> systems. The isosurface value is set to 0.003 e/Bohr<sup>3</sup>. The yellow and cyan regions represent positive and negative charges, respectively.

**Fig. S8.** The kinetic barriers of key steps and corresponding atomic configurations of initial states (IS), transitional states (TS), final states (FS) for NRR and HER on TiB<sub>2</sub> (a-b) and NbB<sub>2</sub> (c-d) monolayers.

**Table S1.** The optimized lattice constants ( $a$ ,  $b$ ), buckling height, B-B and M-B bond lengths, Bader charge of transition metals, cohesive energies of TiB<sub>2</sub> and NbB<sub>2</sub> monolayers.

| MB <sub>2</sub>  | $a=b$ (Å) | Height (Å) | B-B(Å) | M-B(Å) | Ti/Nb | $E_{coh}$<br>(eV/atom) |
|------------------|-----------|------------|--------|--------|-------|------------------------|
| TiB <sub>2</sub> | 3.13      | 1.20       | 1.81   | 2.17   | 1.16  | -6.49                  |
| NbB <sub>2</sub> | 2.96      | 1.65       | 1.71   | 2.38   | 0.69  | -7.23                  |

**Table S2.** Effective independent elastic constants ( $C_{ij}$ , N/m), Young's modulus ( $E$ , N/m), and Poisson's ratio ( $\nu$ ) of TiB<sub>2</sub> and NbB<sub>2</sub> monolayers.

| MB <sub>2</sub>  | $C_{11}$ | $C_{22}$ | $C_{12}$ | $C_{44}$ | $E$    | $\nu$ |
|------------------|----------|----------|----------|----------|--------|-------|
| TiB <sub>2</sub> | 165.14   | 165.14   | -8.12    | 86.63    | 164.74 | -0.05 |
| NbB <sub>2</sub> | 184.61   | 184.61   | 11.12    | 86.75    | 183.94 | 0.06  |

**Table S3.** Computed adsorption energies ( $E_{ad}$ , eV) of  $N_2$  on boron and transition metal surfaces of  $TiB_2$  and  $NbB_2$  monolayers by end-on and side-on way.

| $TiB_2$    | Adsorption way | $E_{ad}$ | $NbB_2$    | Adsorption way | $E_{ad}$ |
|------------|----------------|----------|------------|----------------|----------|
| B-surface  | end-on         | -0.11    | B-surface  | end-on         | -0.18    |
|            | side-on        | -0.05    |            | side-on        | -0.18    |
| Ti-surface | end-on         | -0.09    | Nb-surface | end-on         | -1.09    |
|            | side-on        | -2.54    |            | side-on        | -3.13    |

**Table S4.** Computed zero-point energies ( $E_{ZPE}$ , eV) and entropy at  $T=298.15$  K ( $TS$ , eV) of different adsorption species for each adsorption species for  $TiB_2$  and  $NbB_2$  monolayers, which are obtained from the vibrational frequency calculations.

| $TiB_2$            |              | $NbB_2$            |              |
|--------------------|--------------|--------------------|--------------|
| Adsorption Species | $E_{ZPE-TS}$ | Adsorption Species | $E_{ZPE-TS}$ |
| * $N_2$            | 0.17         | * $N_2$            | 0.17         |
| * $N_2H$           | 0.47         | * $N_2H$           | 0.47         |
| * $N_2H_2$         | 0.76         | * $N_2H_2$         | 0.74         |
| * $N_2H_3$         | 1.09         | * $N_2H_3$         | 0.94         |
| * $N_2H_4$         | 1.25         | * $N_2H_4$         | 1.21         |
| * $NH$             | 0.34         | * $N_2H_5$         | 1.52         |
| * $NH_2$           | 0.54         | * $NH_2$           | 0.57         |
| * $NH_3$           | 0.91         | * $NH_3$           | 0.93         |

**Table S5.** Computed electronic energies ( $\Delta E$ , eV) and Gibbs free energies ( $\Delta G$ , eV) for each reaction steps

| TiB <sub>2</sub>                                                            |            |            | NbB <sub>2</sub>                                                            |            |            |
|-----------------------------------------------------------------------------|------------|------------|-----------------------------------------------------------------------------|------------|------------|
| Adsorption Species                                                          | $\Delta E$ | $\Delta G$ | Adsorption Species                                                          | $\Delta E$ | $\Delta G$ |
| * $\rightarrow$ *N <sub>2</sub>                                             | -2.54      | -1.99      | * $\rightarrow$ *N <sub>2</sub>                                             | -3.13      | -2.58      |
| *N <sub>2</sub> $\rightarrow$ *N <sub>2</sub> H                             | -0.17      | 0.17       | *N <sub>2</sub> $\rightarrow$ *N <sub>2</sub> H                             | -0.31      | 0.03       |
| *N <sub>2</sub> H $\rightarrow$ *N <sub>2</sub> H <sub>2</sub>              | -0.1       | 0.32       | *N <sub>2</sub> H $\rightarrow$ *N <sub>2</sub> H <sub>2</sub>              | 0.04       | 0.35       |
| *N <sub>2</sub> H <sub>2</sub> $\rightarrow$ *N <sub>2</sub> H <sub>3</sub> | 0.18       | 0.55       | *N <sub>2</sub> H <sub>2</sub> $\rightarrow$ *N <sub>2</sub> H <sub>3</sub> | -2.44      | -2.20      |
| *N <sub>2</sub> H <sub>3</sub> $\rightarrow$ *N <sub>2</sub> H <sub>4</sub> | -2.41      | -2.21      | *N <sub>2</sub> H <sub>3</sub> $\rightarrow$ *N <sub>2</sub> H <sub>4</sub> | 0.25       | 0.55       |
| *N <sub>2</sub> H <sub>4</sub> $\rightarrow$ *NH                            | 1.28       | 0.76       | *N <sub>2</sub> H <sub>4</sub> $\rightarrow$ *N <sub>2</sub> H <sub>5</sub> | 0.27       | 0.62       |
| *NH $\rightarrow$ *NH <sub>2</sub>                                          | 0.20       | 0.44       | *N <sub>2</sub> H <sub>5</sub> $\rightarrow$ *NH <sub>2</sub>               | 1.40       | 0.84       |
| *NH <sub>2</sub> $\rightarrow$ *NH <sub>3</sub>                             | 0.17       | 0.58       | *NH <sub>2</sub> $\rightarrow$ *NH <sub>3</sub>                             | 0.24       | 0.64       |
| *NH <sub>3</sub> $\rightarrow$ *                                            | 0.82       | 0.33       | *NH <sub>3</sub> $\rightarrow$ *                                            | 1.32       | 0.78       |

**Table S6.** Optimized N-N bond lengths (Å) during the NRR on TiB<sub>2</sub> and NbB<sub>2</sub> monolayers.

| MB <sub>2</sub>  | N $\equiv$ N | *N <sub>2</sub> | *N <sub>2</sub> H | *N <sub>2</sub> H <sub>2</sub> | *N <sub>2</sub> H <sub>3</sub> | *N <sub>2</sub> H <sub>4</sub> |
|------------------|--------------|-----------------|-------------------|--------------------------------|--------------------------------|--------------------------------|
| TiB <sub>2</sub> | 1.123        | 1.337           | 1.415             | 1.473                          | 1.471                          | 3.498                          |
| NbB <sub>2</sub> | 1.123        | 1.339           | 1.403             | 1.461                          | 3.167                          | /                              |

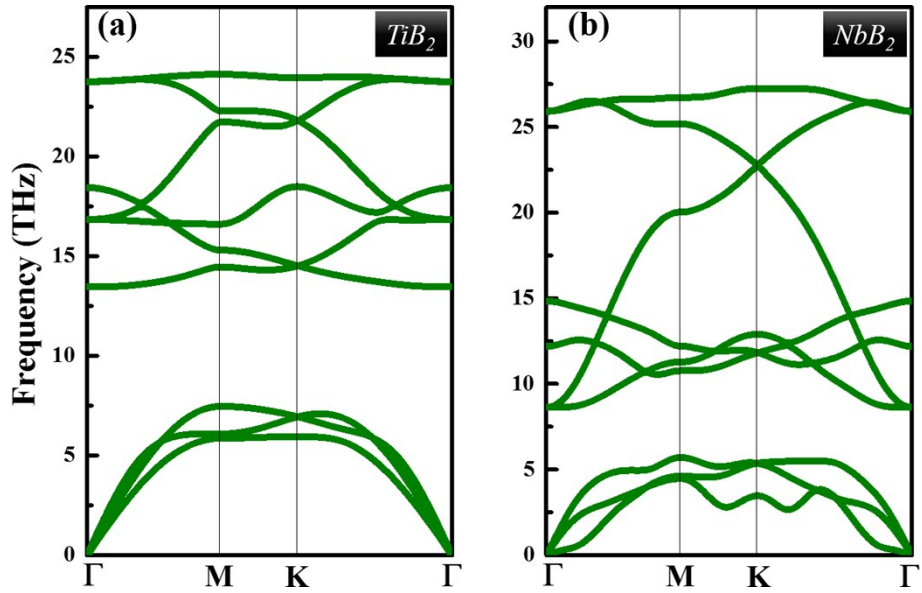

**Fig. S1.** Phonon spectra of (a)  $\text{TiB}_2$  and (b)  $\text{NbB}_2$  monolayers.

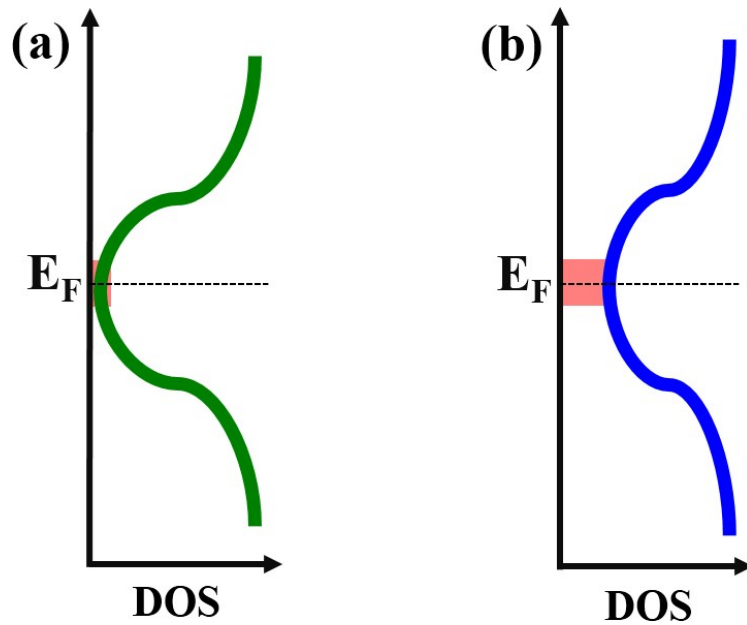

**Fig. S2.** Schematic diagrams of density of states around Fermi level for (a)  $\text{TiB}_2$  and (b)  $\text{NbB}_2$  monolayers.

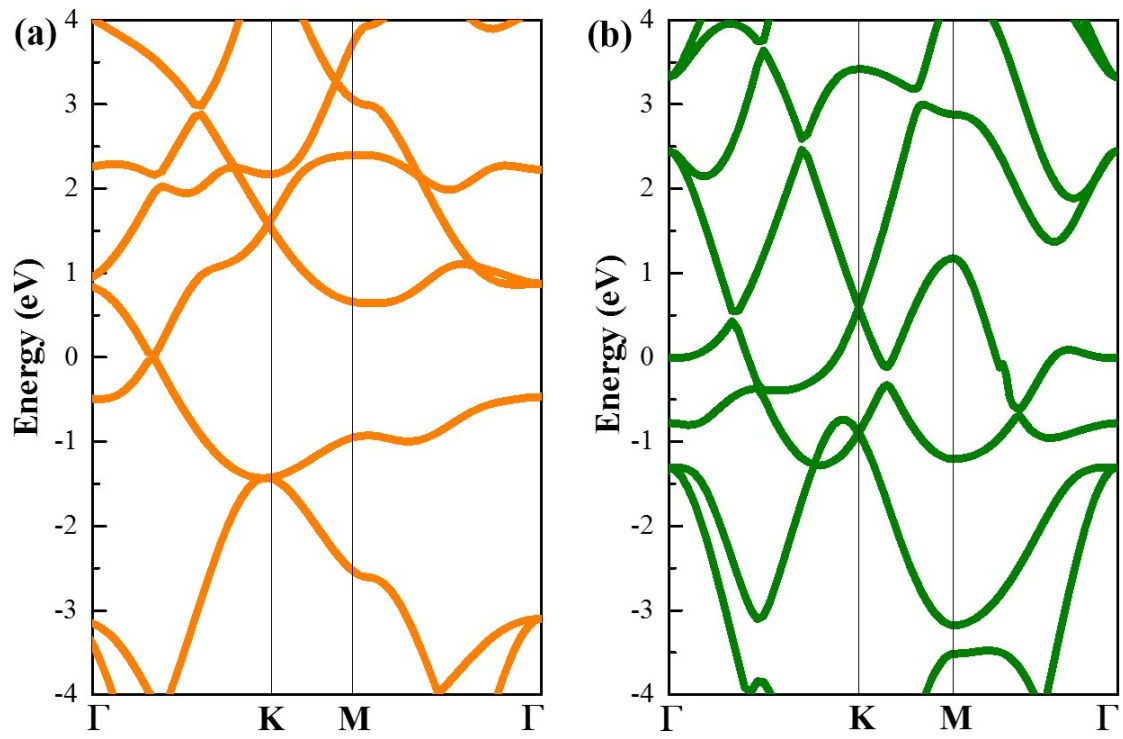

**Fig. S3.** The band structures based on HSE06 functional of (a) TiB<sub>2</sub> and (b) NbB<sub>2</sub> monolayers.

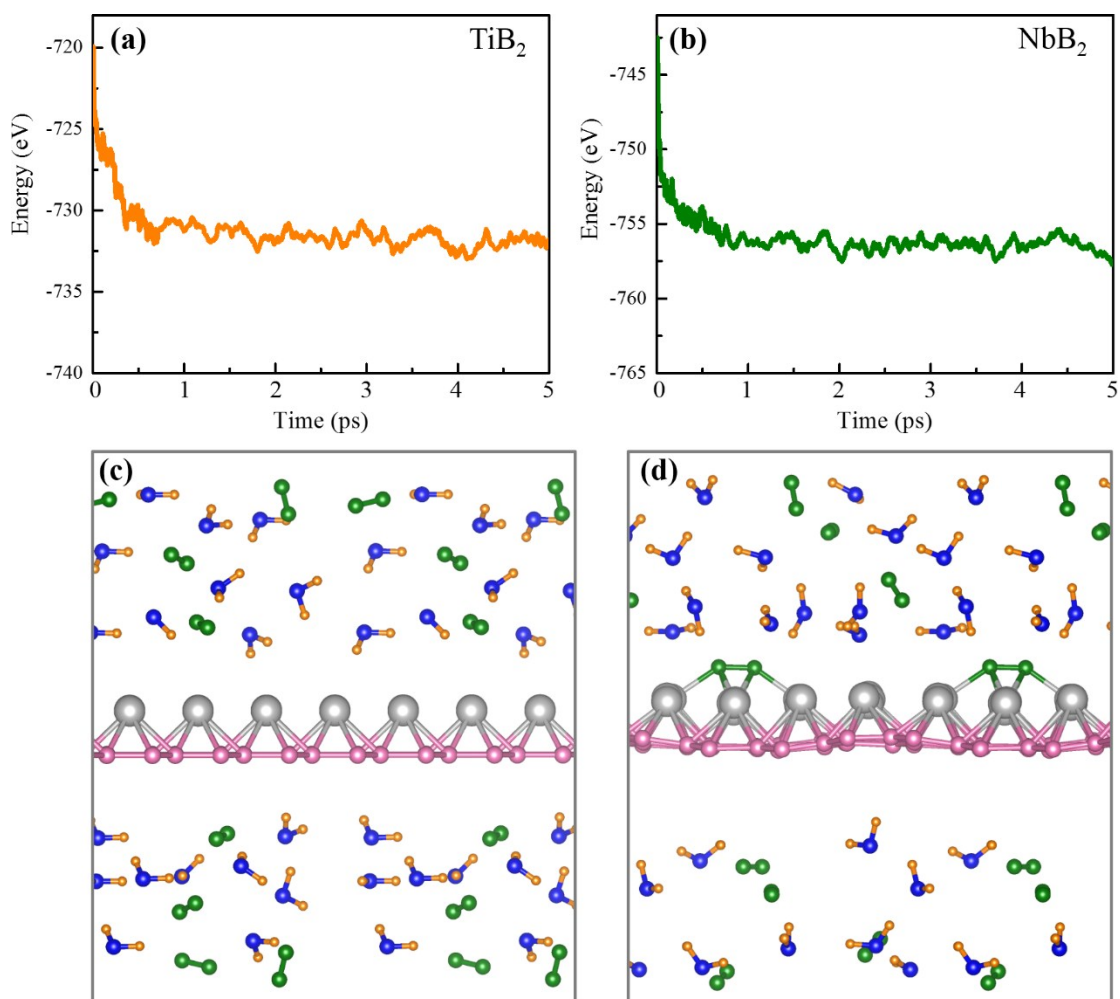

**Fig. S4.** Variations of the DFT energy of (a) TiB<sub>2</sub> and (b) NbB<sub>2</sub> monolayer from 0 to 5 ps during ab initio molecular dynamics (AIMD) simulations at the temperature of 300 K under H<sub>2</sub>O and N<sub>2</sub> atmosphere. (c-d) Snapshot of atomic configuration of AIMD simulations for NbB<sub>2</sub> monolayer. (c) is the initial structure, and (d) is the final structure after 5 ps. The model we use here includes a  $4 \times 4 \times 1$  TiB<sub>2</sub>/NbB<sub>2</sub> supercell, 4 N<sub>2</sub> molecules, and 9 H<sub>2</sub>O molecules. Green, blue, orange atoms are N, O, H, respectively. Gray and pink atoms represent Nb and B.



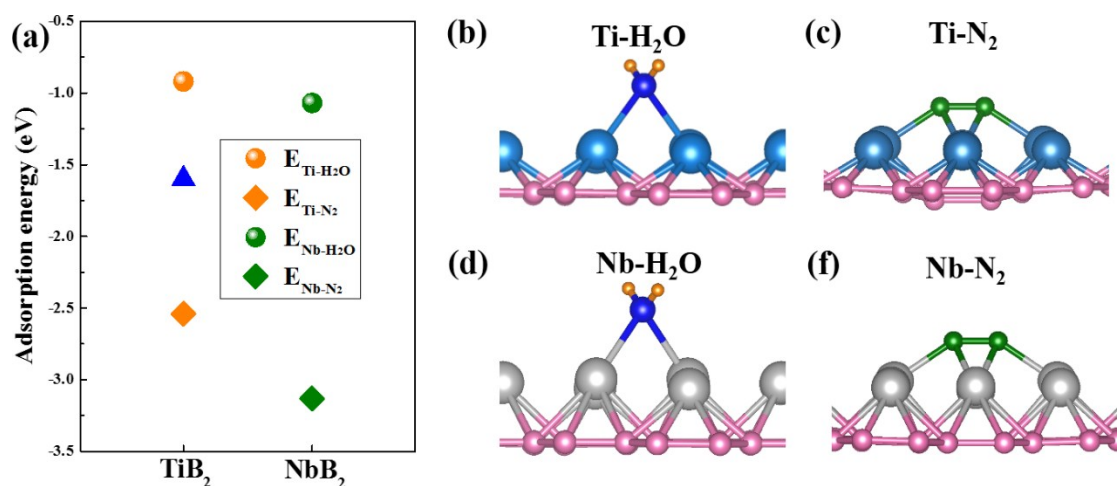

**Fig. S5.** (a) The adsorption energies between TMs and O/H atoms of H<sub>2</sub>O/N<sub>2</sub> on the TM side of 2D TiB<sub>2</sub> and NbB<sub>2</sub> monolayers. (b-d) The atomic structures of H<sub>2</sub>O and N<sub>2</sub> adsorbed on the TM side of 2D TiB<sub>2</sub> and NbB<sub>2</sub> monolayers.

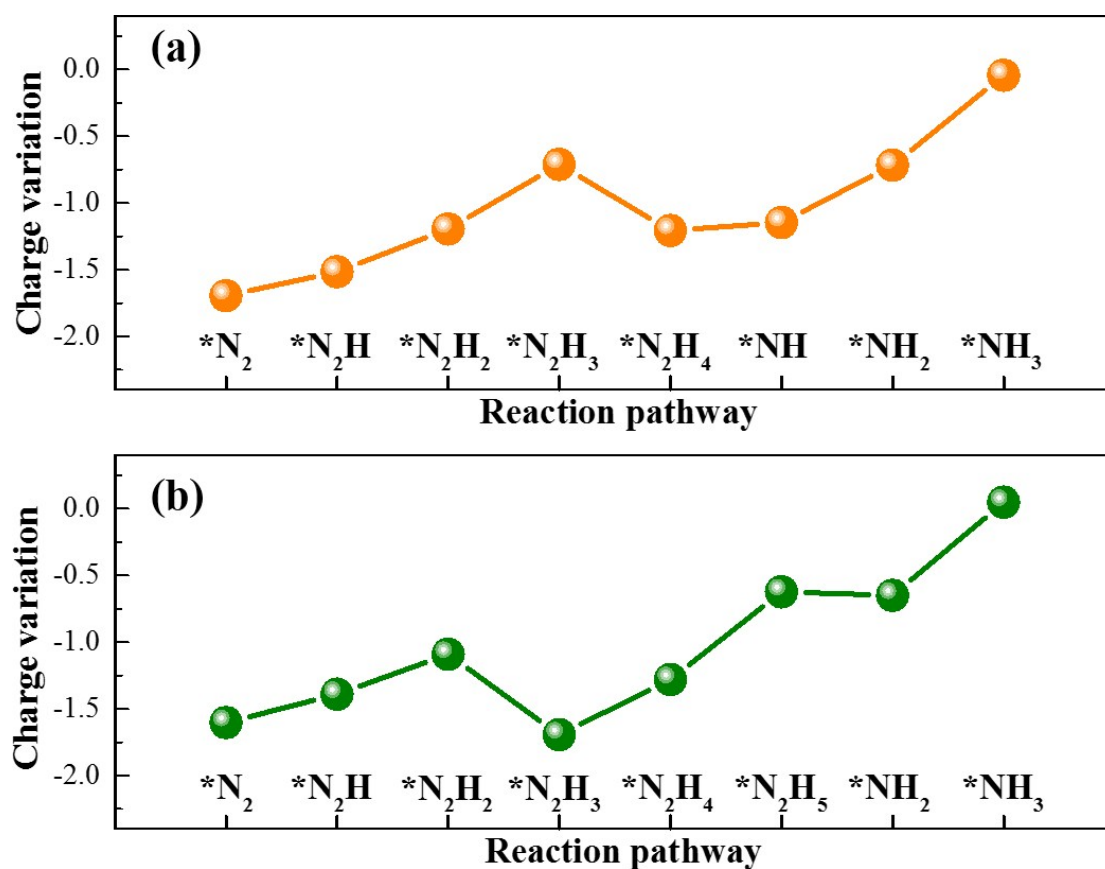

**Fig. S6.** The charge variations of the \*N<sub>x</sub>H<sub>y</sub> during the NRR steps for (a) TiB<sub>2</sub> and (b) NbB<sub>2</sub> monolayers.

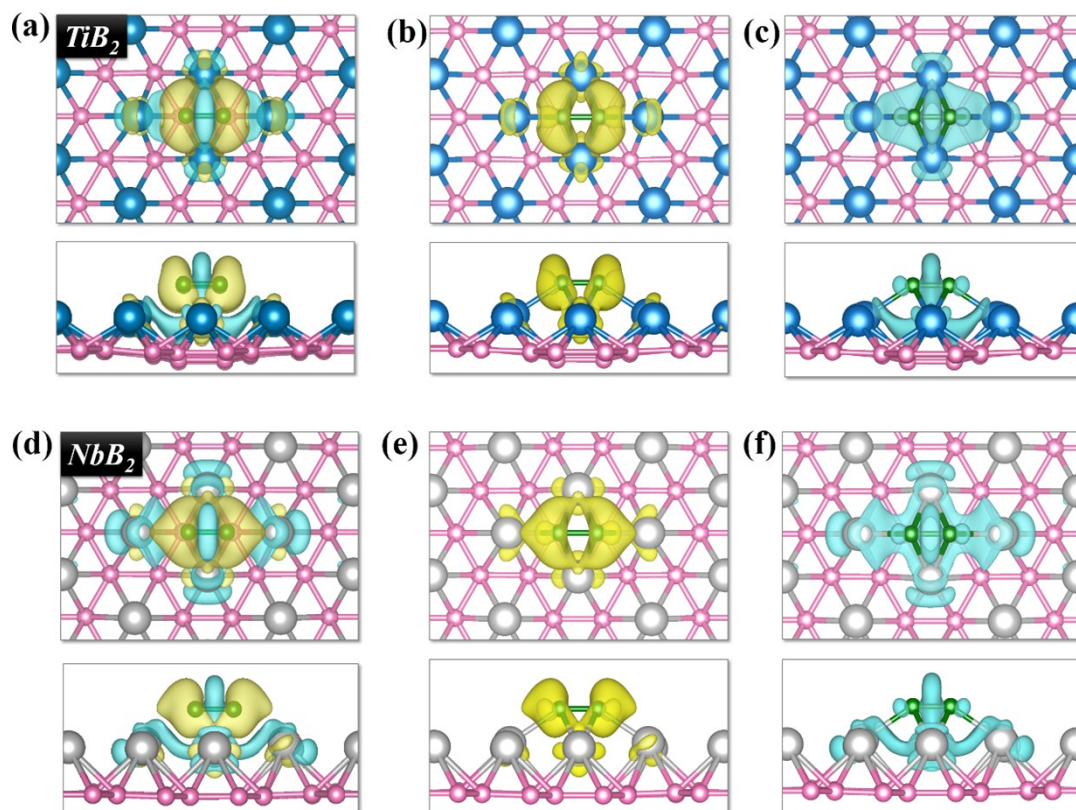

**Fig. S7.** Charge density difference of (a-c)  $N_2$ - $TiB_2$  and (d-f)  $N_2$ - $NbB_2$  systems. The isosurface value is set to  $0.003 \text{ e/Bohr}^3$ . The yellow and cyan regions represent positive and negative charges, respectively.

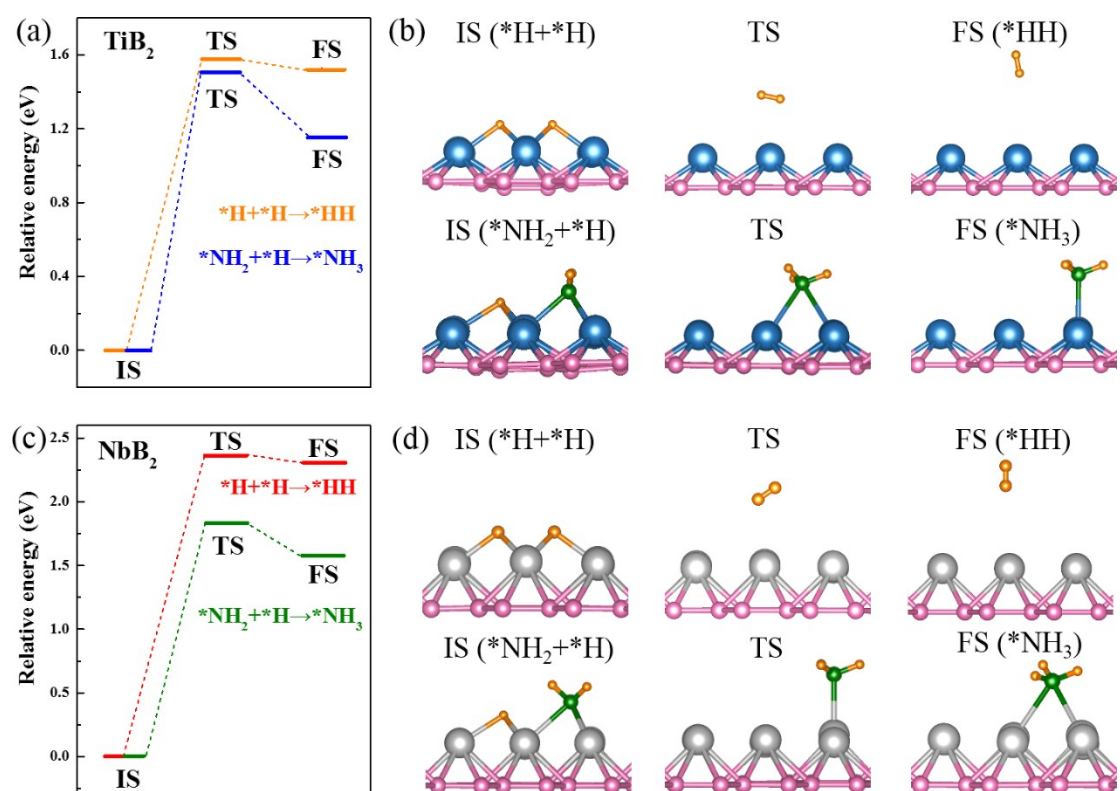

**Fig. S8.** The kinetic barriers of key steps and corresponding atomic configurations of initial states (IS), transitional states (TS), final states (FS) for NRR and HER on TiB<sub>2</sub> (a-b) and NbB<sub>2</sub> (c-d) monolayers.
